# Supplementary material for: Machine Learning Driven Land Surface Temperature Prediction and Urban Heat Risk Assessment in The Gambia
Source: Research Square preprint supplement (doi:10.21203/rs.3.rs-8220651/v1), 2025-12-18
Supplement: Supplementary file 1 [file 329c0b01042003cc8c7074b6.docx]

# **Supplementary Data**

**Machine Learning Driven Land Surface Temperature Prediction and Urban Heat Risk Assessment in The Gambia**

**Rodrigue Samba,c, Adyasha Jenab, S. Manavvi*, Uttam Kumar Roya, and Basant Yadavb**

a Department of Architecture and Planning, Indian Institute of Technology, Roorkee, Uttarakhand, India

b Department of Water Resources Development and Management, Indian Institute of Technology, Roorkee, Uttarakhand, India

c School of Engineering and Architecture, University of the Gambia, Banjul, Gambia

*Corresponding Author: E-mail: [manavvi.suneja@ar.iitr.ac.in](mailto:manavvi.suneja@ar.iitr.ac.in) (Dr. S. Manavvi)


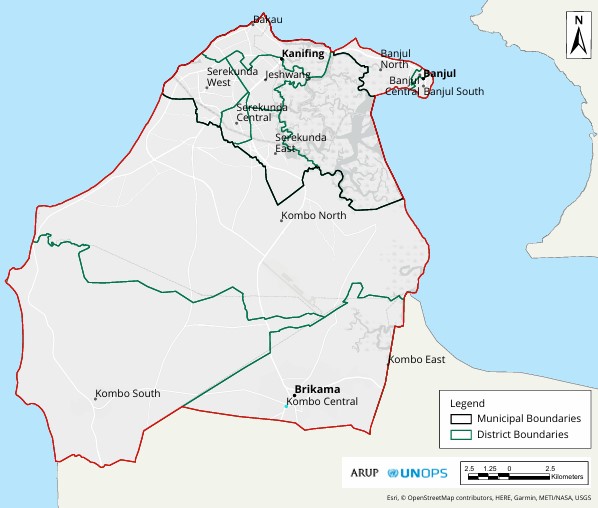


Fig_A: Municipal boundary Map of Greater Banjul Area (GBA), The Gambia.
Source: (“Greater Banjul Area 2040 Development Plan,” 2022)


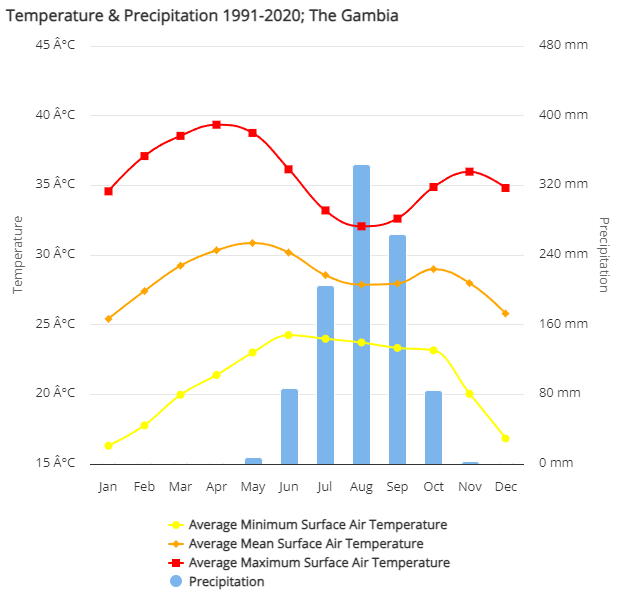


Fig_B : Temperature and Precipitation graph Source: (World Bank Climate Change Knowledge Portal, 2024)

## **TEXT A : Producer’s Accuracy and User’s Accuracy for Kappa coefficient**

Table A: Table: Detailed Kappa coefficient for accuracy assessment.

|  | **Year-1990** | | | | | | | | | | |
| --- | --- | --- | --- | --- | --- | --- | --- | --- | --- | --- | --- |
|  | **Classified Data** | **Water Body** | **Trees** | **Flooded Vegetation** | **Crop Land** | **Built Area** | **Bare Land** | **Range Land** | **Total** | **U_ (Accuracy) (%)** | **Kappa (%)** |
|  | Water Body | 13 | 0 | 0 | 0 | 0 | 0 | 0 | 13 | 1 | 0 |
|  | Trees | 0 | 41 | 0 | 0 | 0 | 0 | 1 | 42 | 0.98 | 0 |
|  | Flooded Vegetation | 1 | 0 | 31 | 0 | 0 | 0 | 0 | 32 | 0.97 | 0 |
|  | Crops | 0 | 2 | 0 | 79 | 0 | 0 | 0 | 81 | 0.98 | 0 |
|  | Built Area | 0 | 6 | 0 | 1 | 52 | 2 | 1 | 62 | 0.84 | 0 |
|  | Bare Ground | 0 | 1 | 5 | 0 | 1 | 20 | 1 | 28 | 0.71 | 0 |
|  | Rangeland | 1 | 7 | 0 | 0 | 0 | 3 | 231 | 242 | 0.95 | 0 |
|  | **Total** | 15 | 57 | 36 | 80 | 53 | 25 | 234 | 500 | 0 | 0 |
|  | **P_Accuracy** | 0.87 | 0.72 | 0.86 | 0.99 | 0.98 | 0.8 | 0.99 | 0 | 0.93 | 0 |
|  | **Kappa** | 0 | 0 | 0 | 0 | 0 | 0 | 0 | 0 | 0 | 0.91 |
| **Year-2006** | | | | | | | | | | | |
|  | Water Body | 7 | 0 | 0 | 0 | 1 | 0 | 0 | 8 | 0.875 | 0 |
|  | Trees | 0 | 24 | 0 | 0 | 0 | 0 | 0 | 24 | 1 | 0 |
|  | Flooded Vegetation | 0 | 0 | 35 | 0 | 0 | 0 | 0 | 35 | 1 | 0 |
|  | Crops | 0 | 0 | 0 | 124 | 0 | 0 | 0 | 124 | 1 | 0 |
|  | Built Area | 0 | 1 | 0 | 3 | 222 | 2 | 2 | 230 | 0.97 | 0 |
|  | Bare Ground | 0 | 0 | 0 | 0 | 0 | 10 | 0 | 10 | 1.00 | 0 |
|  | Rangeland | 0 | 7 | 0 | 0 | 0 | 0 | 61 | 68 | 0.90 | 0 |
|  | **Total** | 7 | 32 | 35 | 127 | 223 | 12 | 63 | 499 | 0.00 | 0 |
|  | **P_Accuracy** | 1 | 0.75 | 1 | 0.976 | 0.996 | 0.83 | 0.97 | 0 | 0.97 | 0 |
|  | **Kappa** | 0 | 0 | 0 | 0 | 0 | 0 | 0 | 0 | 0 | 0.95 |
| **Year-2010** | | | | | | | | | | | |
|  | Water Body | 1 | 0 | 0 | 0 | 0 | 0 | 0 | 1 | 1 | 0 |
|  | Trees | 0 | 75 | 0 | 1 | 0 | 1 | 2 | 79 | 0.95 | 0 |
|  | Flooded Vegetation | 1 | 0 | 47 | 0 | 2 | 0 | 0 | 50 | 0.94 | 0 |
|  | Crops | 0 | 1 | 0 | 41 | 0 | 0 | 0 | 42 | 0.98 | 0 |
|  | Built Area | 0 | 4 | 0 | 7 | 231 | 1 | 6 | 249 | 0.93 | 0 |
|  | Bare Ground | 0 | 0 | 0 | 0 | 0 | 12 | 0 | 12 | 1 | 0 |
|  | Range Land | 0 | 6 | 3 | 1 | 1 | 0 | 56 | 67 | 0.84 | 0 |
|  | **Total** | 2 | 86 | 50 | 50 | 234 | 14 | 64 | 500 | 0 | 0 |
|  | **P_Accuracy** | 0.5 | 0.87 | 0.94 | 0.82 | 0.99 | 0.86 | 0.875 | 0 | 0.926 | 0 |
|  | **Kappa** | 0 | 0 | 0 | 0 | 0 | 0 | 0 | 0 | 0 | 0.89 |
| **Year-2020** | | | | | | | | | | | |
|  | Water Body | 2 | 0 | 0 | 0 | 0 | 0 | 0 | 2 | 1 | 0 |
|  | Trees | 0 | 5 | 0 | 0 | 0 | 0 | 0 | 5 | 1.00 | 0 |
|  | Flooded Vegetation | 0 | 0 | 13 | 0 | 0 | 1 | 0 | 14 | 0.928571 | 0 |
|  | Crops | 0 | 0 | 0 | 3 | 1 | 0 | 0 | 4 | 0.75 | 0 |
|  | Built Area | 0 | 1 | 0 | 0 | 55 | 0 | 0 | 56 | 0.98 | 0 |
|  | Bare Gand | 0 | 0 | 0 | 0 | 0 | 0 | 0 | 0 | 0 | 0 |
|  | Rangeland | 0 | 1 | 0 | 0 | 0 | 0 | 16 | 17 | 0.94 | 0 |
|  | **Total** | 2 | 7 | 13 | 3 | 56 | 0 | 16 | 98 | 0 | 0 |
|  | **P_Accuracy** | 1 | 0.71 | 1 | 1 | 0.98 | 1.00 | 1 | 0 | 0.959184 | 0 |
|  | **Kappa** | 0 | 0 | 0 | 0 | 0 | 0 | 0 | 0 | 0 | 0.93 |

**A.2: NDVI Calculation in Google Earth Engine (GEE)**

Image Collections Used:

- Landsat 5 (1990, 2006, 2010): 'LANDSAT/LT05/C02/T1_L2'
- Landsat 8 (2020): 'LANDSAT/LC08/C02/T1_L2'
- Sentinel-2 (2020): 'COPERNICUS/S2'

General Processing Steps:

1. Define ROI: Upload shapefile of the GBA to GEE Assets.
2. Filter Imagery: Select images from specified year with less than 20% cloud cover.
3. Apply Scaling:
   - Optical Bands: Multiply by 0.0000275 and subtract 0.2
   - Thermal Band: Multiply by 0.00341802 and add 149.0
4. NDVI Formula Used:

NDVI = (NIR−Red) / ​(NIR+Red)

- - For Landsat: SR_B4 (NIR), SR_B3 (Red)
  - For Sentinel-2: B8 (NIR), B4 (Red)

1. Classification Thresholds:
   - Bare/urban/open land: NDVI < 0.1
   - Scrub/agriculture: NDVI 0.1–0.3
   - Vegetation/forest: NDVI > 0.3
2. Visualization Palette:
   - ['#FF0000', '#FFFF00', '#00FF00', '#006400']
     (Red → Yellow → Green → Dark Green)
3. Export:
   - NDVI maps exported as GeoTIFF to Google Drive.
   - Files imported to ArcMap and classified into five vegetation classes for further analysis.

**A.3: Sentinel-2 Cloud Masking and NDVI**

- Cloud Masking: QA60 band used.
  - Cirrus cloud bit: 11th bit
  - Cloud bit: 10th bit

Bitmask Function Used in GEE:

var maskClouds = function(image) {

var qa = image.select('QA60');

var cloudBitMask = 1 << 10;

var cirrusBitMask = 1 << 11;

var mask = qa.bitwiseAnd(cloudBitMask).eq(0)

.and(qa.bitwiseAnd(cirrusBitMask).eq(0));

return image.updateMask(mask);

};

**A.4: Normalized Difference Built-Up Index (NDBI)**

- **Formula:**

NDBI = (SWIR−NIR) / (SWIR+NIR)​

- **Bands Used:**
  - Landsat 5: SR_B5 (NIR), SR_B6 (SWIR)
  - Landsat 8: SR_B5 (NIR), SR_B6 (SWIR)
- **Processing Steps in GEE:**
  - Filter images by year.
  - Apply the formula directly on image collections.
  - Apply a mean reducer to generate annual NDBI composites.
- **Output:**
  - NDBI maps were exported as GeoTIFFs to Google Drive.
  - Higher values indicate more urban/built-up areas.

**A.5: Export and post-processing**

- Export Format: GeoTIFF (.tif) files
- GEE Export Code Example:

Export.image.toDrive({

image: final_ndvi_clip,

description: 'NDVI_2020',

scale: 30,

region: ROI,

fileFormat: 'GeoTIFF'

});

- **ArcMap post-processing:**
  - Imported exported layers.
  - Applied color ramps and classified layers based on NDVI/NDBI ranges.
  - Generated maps and graphs for interpretation.
